# Supplementary figures and images for: NPT088 reduces both amyloid-β and tau pathologies in transgenic mice
Source: PubMed Central journal article supplement — Alzheimers Dement (N Y). 2016 Jul 14;2(3):141–55. doi: 10.1016/j.trci.2016.06.004 (PMC5651359; doi:10.1016/j.trci.2016.06.004), 2016-07-14

# Supplemental Figure 1.

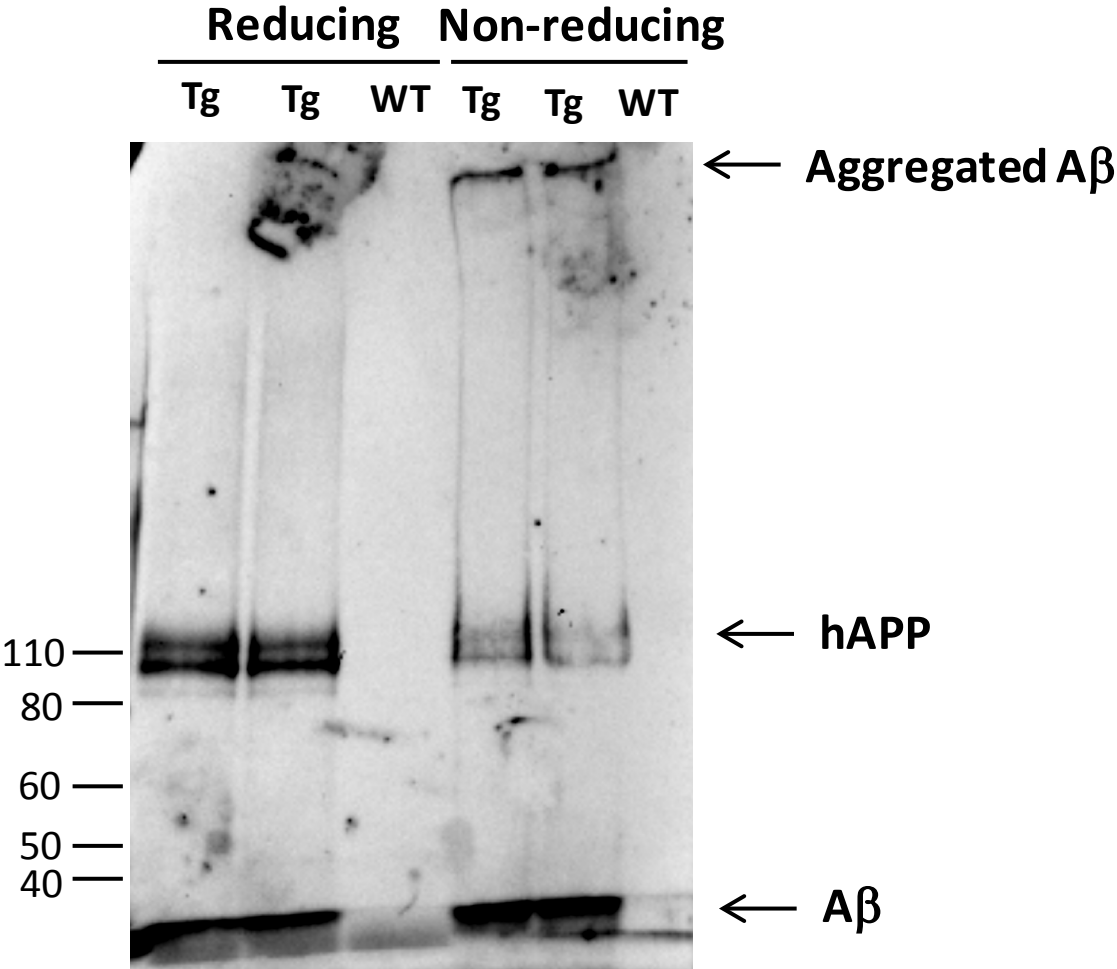

Supplement: mmc1.pdf [file mmc1.pdf]

# Supplemental Figure 2.

## A.

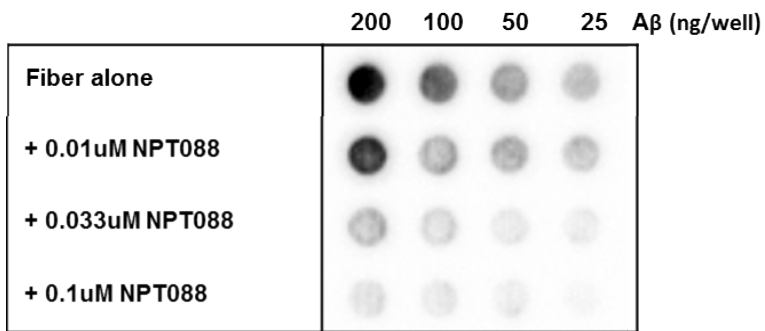

## B.

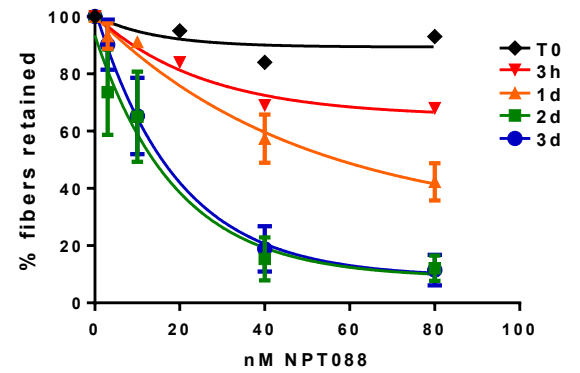

## C.

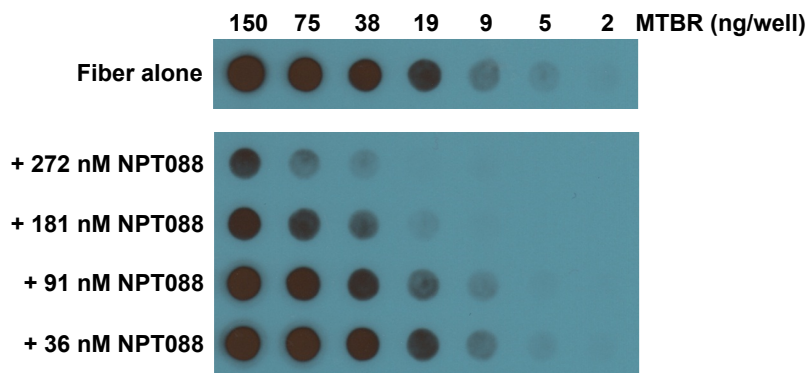

Supplement: mmc2.pdf [file mmc2.pdf]

# Supplemental Figure 3.

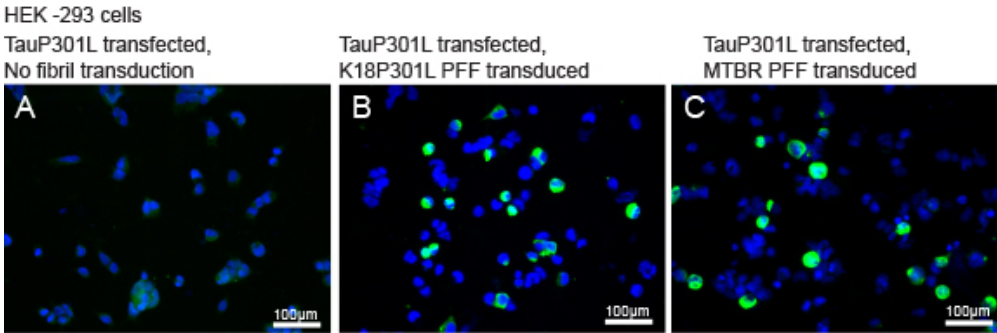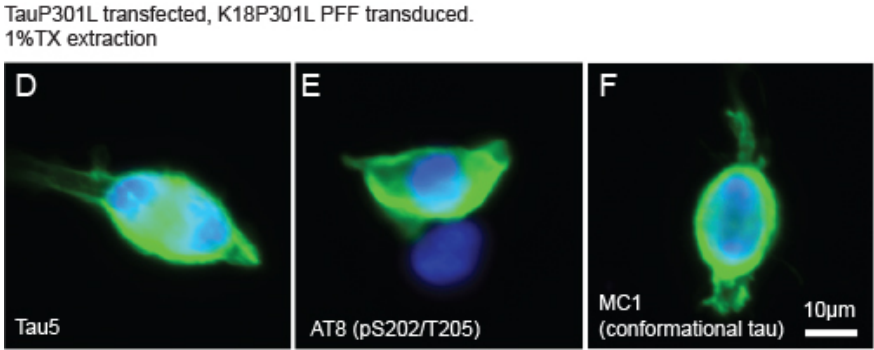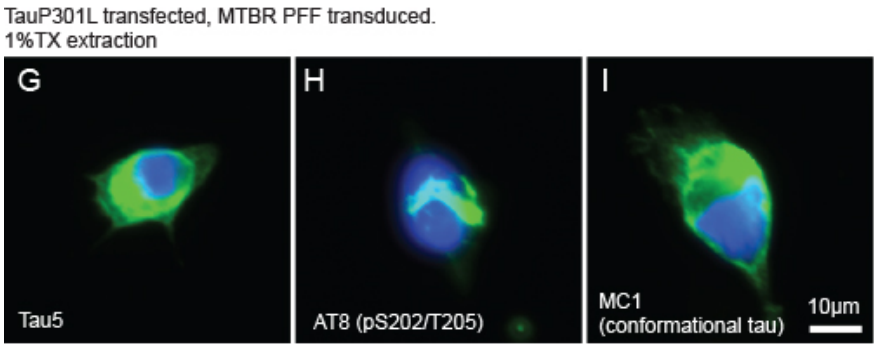

Supplement: mmc3.pdf [file mmc3.pdf]

# Supplemental Figure 4.

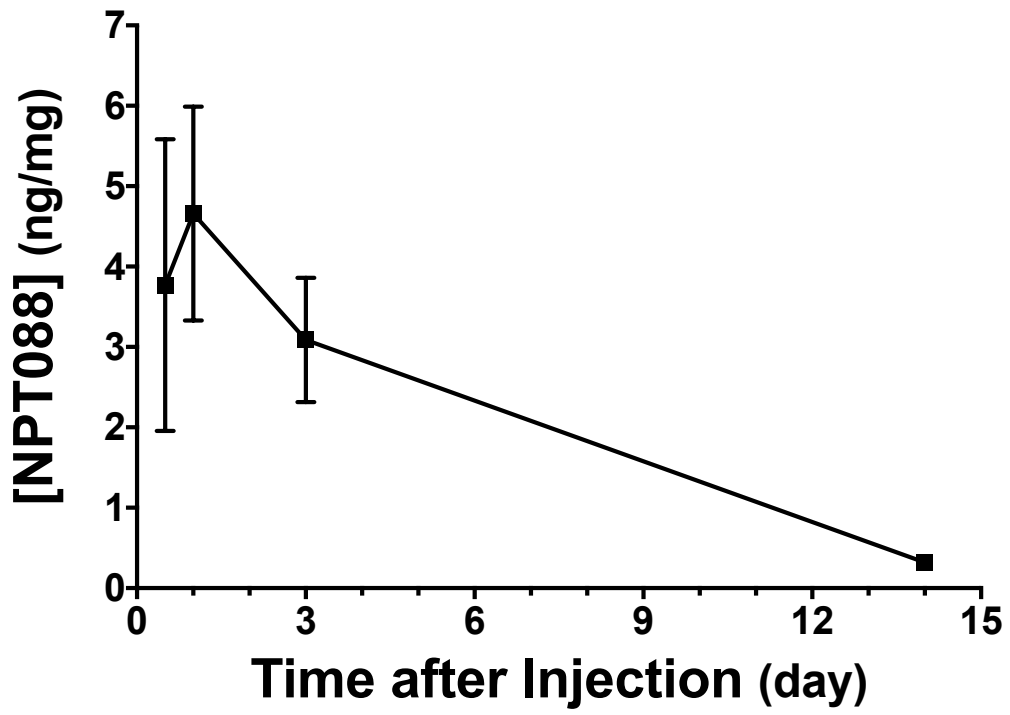

Supplement: mmc4.pdf [file mmc4.pdf]

# Supplemental Figure 5.

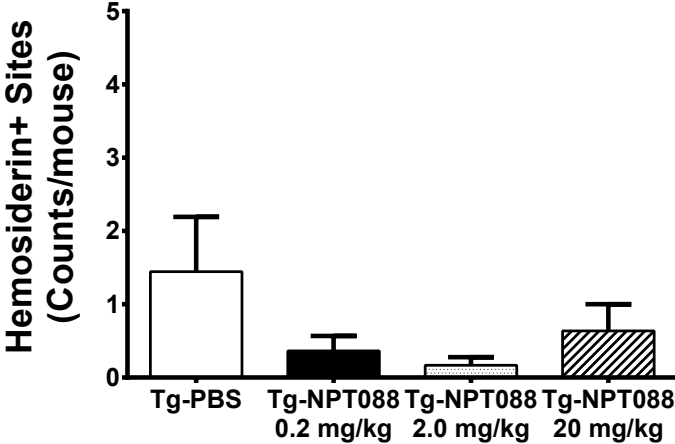

Supplement: mmc5.pdf [file mmc5.pdf]

# Supplemental Figure 6.

**A.**

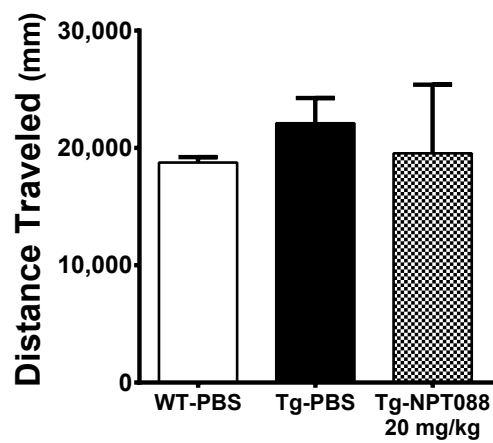

**B.**

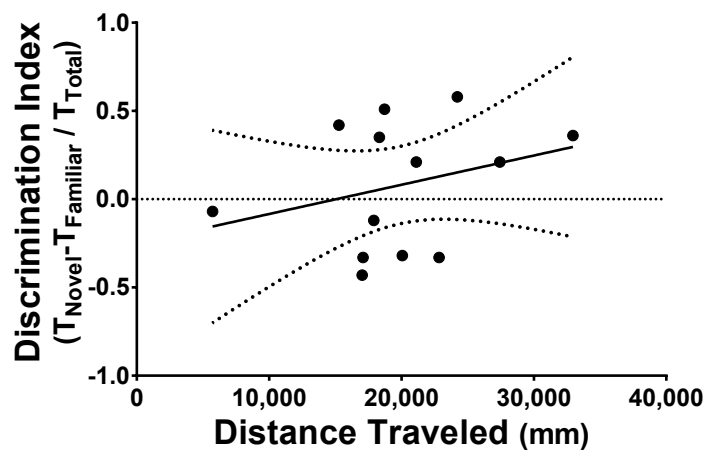

Supplement: mmc6.pdf [file mmc6.pdf]

# Supplemental Figure 7.

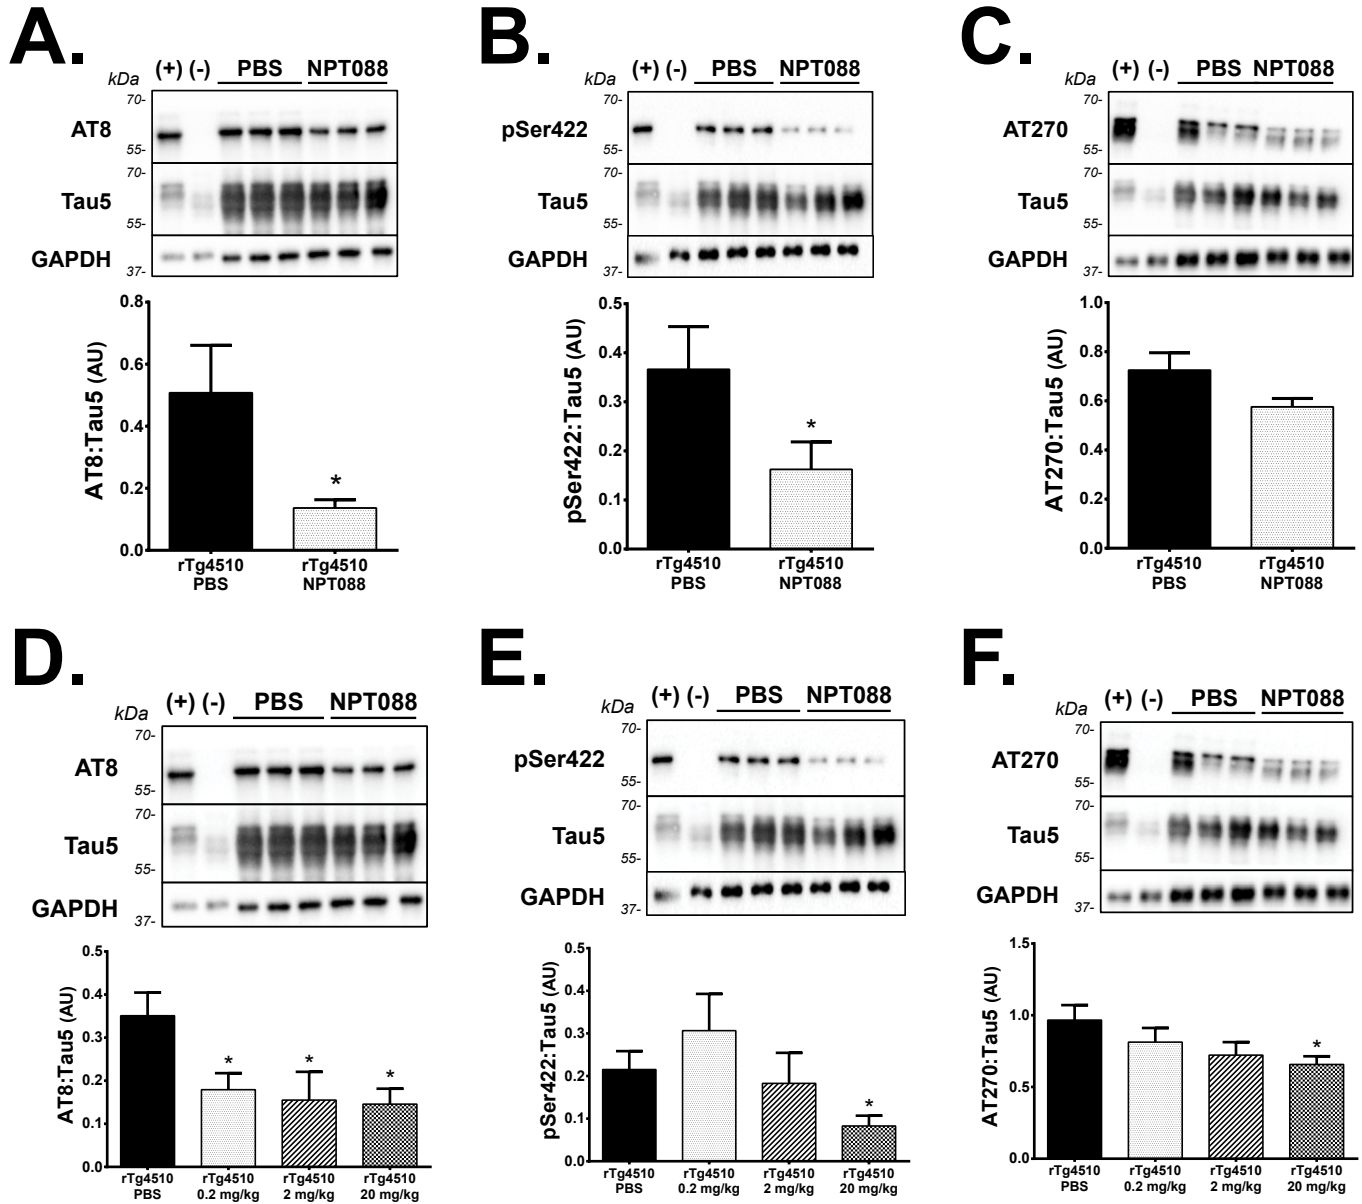

Supplement: mmc7.pdf [file mmc7.pdf]
